# Supplementary material for: DOT1L inhibition exerts anti-tumor effects by activating interferon signaling in breast cancer cells
Source: Research Square preprint supplement (doi:10.21203/rs.3.rs-6365502/v1), 2025-08-06
Supplement: Supplementary file 1 [file c7f511ee062924c6575c45d6.docx]

**Supplementary methods**

**Single-cell Assay for Transposase-Accessible Chromatin sequencing**

SKBR3 cells were treated with drugs for 6, 9 or 12 days as described above. Single-cell Assay for Transposase-Accessible Chromatin sequencing (scATAC-seq) libraries were generated using a droplet-based combinatorial indexing approach with some modifications [1]. A custom indexed-Tn5 transposase was prepared following a previously described protocol [2]. Library preparation involved tagmentation with the indexed-Tn5, followed by the use of the SureCell ATAC-Seq Library Prep Kit (Bio-Rad, Hercules, CA, USA) and the ddSEQ Single-Cell Isolator system (Bio-Rad). Q5 HiFi DNA Polymerase (New England Biolabs, Ipswich, MA, USA) and USER II Enzyme (New England Biolabs) were incorporated into the Barcode Reaction and Enzyme Reaction mixes. The finalized scATAC-seq libraries were loaded at a concentration of 1.5 pM onto a NextSeq 550 platform (Illumina), after which sequencing was conducted using the following parameters: Read 1, 118 cycles; i7 index read, 8 cycles; Read 2, 40 cycles.

The hg19 genome assembly was used for all scATAC-seq analyses. The initial processing of scATAC-seq data to generate barcoded and aligned read BAM files was performed using the ATAC‑Seq Analysis Toolkit (Bio-Rad). Sequencing data were then processed by converting the BAM files into fragment files using Rsamtools (https://bioconductor.org/packages/Rsamtools). ArchR v1.0.2 was used for further analysis unless otherwise noted [3]. Fragment files were loaded using the createArrowFiles function. Quality control analysis was conducted for each cell; cells with a transcription start site (TSS) enrichment score < 4 and number of unique fragments < 2500 were excluded. After creating arrow files for each sample using createArrowFiles, an ArchR project was generated by ArchRProject. To filter out doublets, addDoubletScores with k = 10, knnMethod = “UMAP,” LSIMethod = 1 was used. For clustering, iterative latent semantic indexing (LSI) was performed using the addIterativeLSI function with a genome-wide 500 bp tile matrix. Cells were clustered with the addClusters function, and uniform manifold approximation and projection (UMAP) embeddings were generated using the addUMAP function. Gene activity scores were visualized using the plotEmbedding function, with imputation weights calculated via the addImputeWeights function. Peak calling was conducted using the addGroupCoverage and addReproduciblePeakSet functions. Motif scores were computed using addMotifAnnotation(motifSet = "cisbp") and addDeviationMatrix. For pseudotime analysis, trajectories were inferred using the addTrajectory function, and motif enrichment along pseudotime was visualized using plotTrajectory and plotTrajectoryHeatmap.

**References**

1. Lareau CA, Duarte FM, Chew JG, Kartha VK, Burkett ZD, Kohlway AS, et al. Droplet-based combinatorial indexing for massive-scale single-cell chromatin accessibility. Nat Biotechnol. 2019;37(8):916-924.

2. Picelli S, Bjorklund AK, Reinius B, Sagasser S, Winberg G, Sandberg R. Tn5 transposase and tagmentation procedures for massively scaled sequencing projects. Genome Res. 2014;24(12):2033-2040.

3. Granja JM, Corces MR, Pierce SE, Bagdatli ST, Choudhry H, Chang HY, et al. ArchR is a scalable software package for integrative single-cell chromatin accessibility analysis. Nat Genet. 2021;53(3):403-411.
