# Supplementary material for: DOT1L inhibition exerts anti-tumor effects by activating interferon signaling in breast cancer cells
Source: Research Square preprint supplement (doi:10.21203/rs.3.rs-6365502/v1), 2025-08-06
Supplement: Supplementary file 2 [file f618fb58ab0f8b553bdd0531.docx]

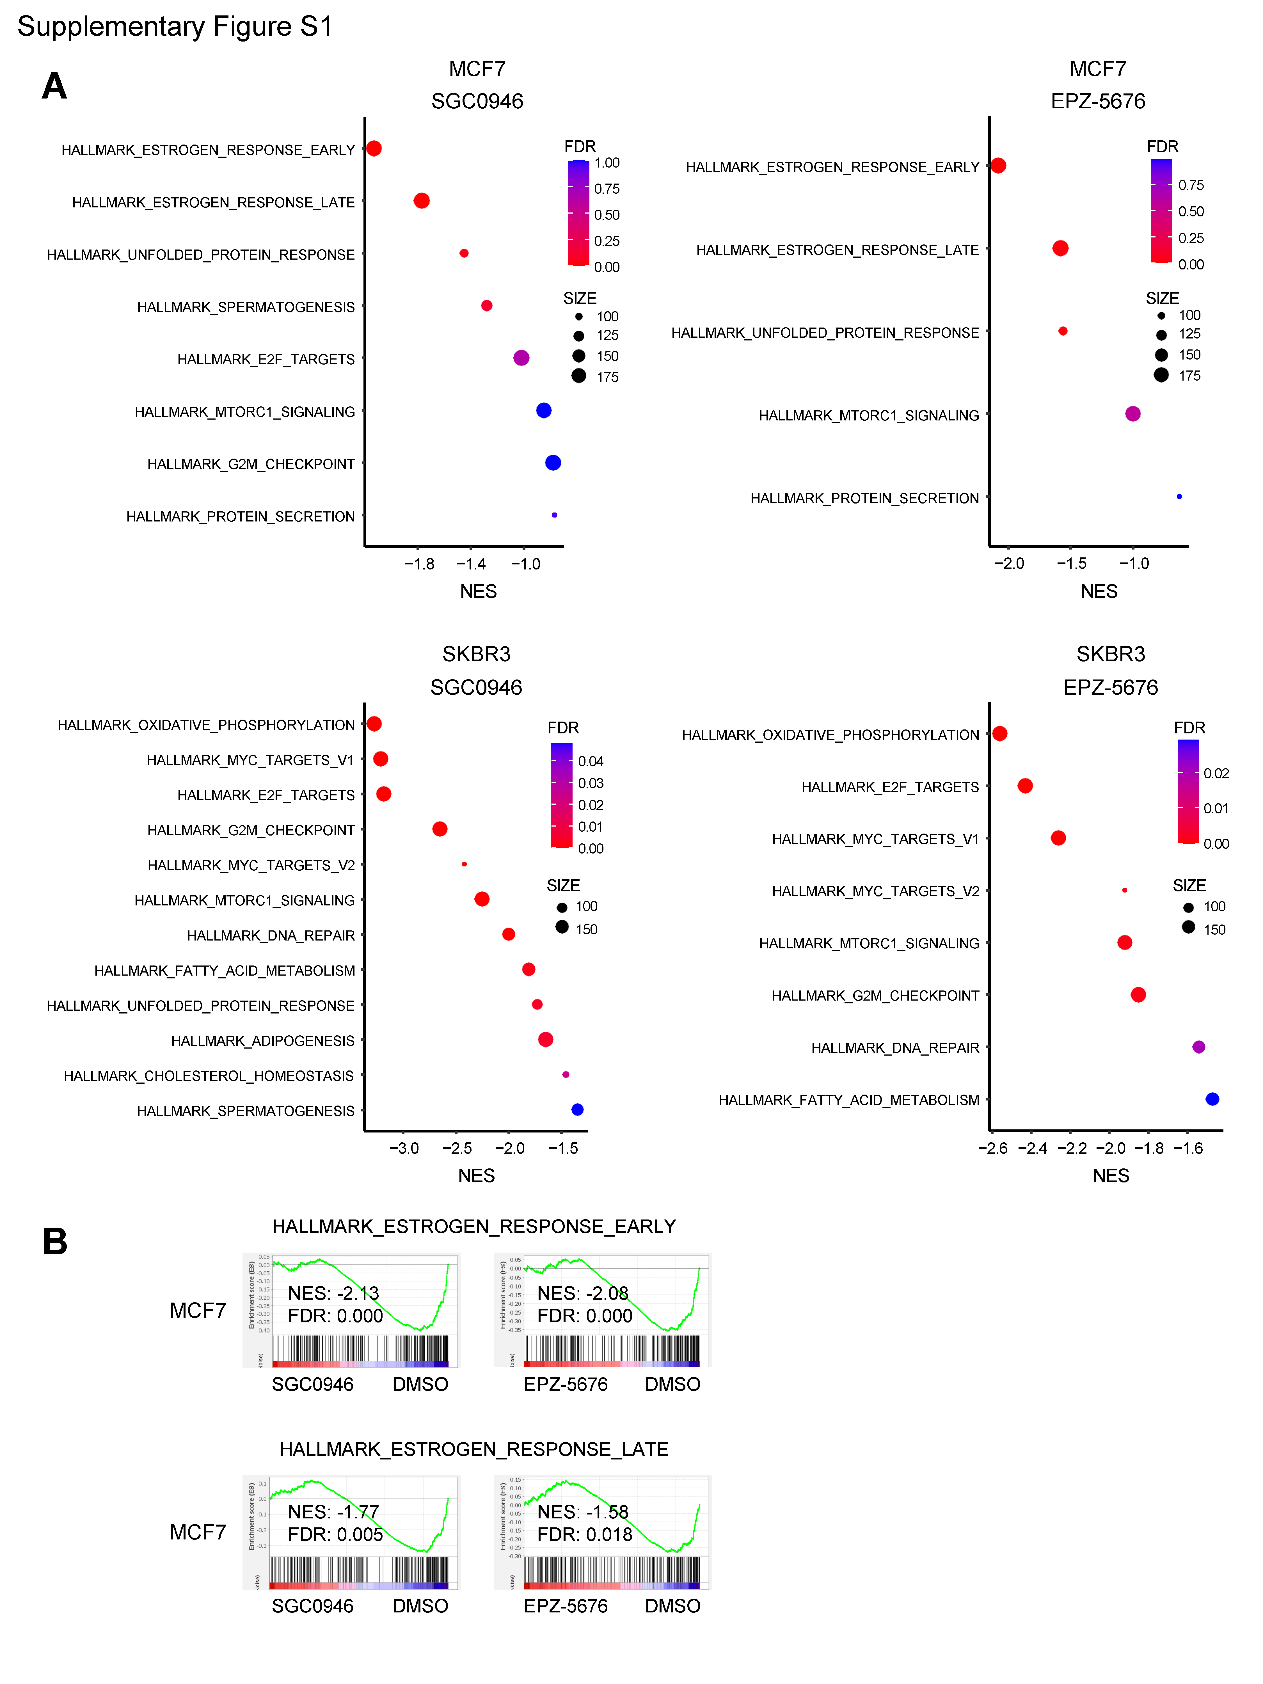


**Supplementary Figure S1**

Effects of DOT1L inhibition on gene expression profiles in breast cancer cells. (A) Gene expression microarray analysis in MCF7 or SKBR3 cells treated for 6 days with DMSO, SGC0946 or EPZ-5676. Summarized results of GSEA using genes downregulated by the indicated DOT1L inhibitor are shown. NES, normalized enrichment score; FDR, false discovery rate. (B) GSEA of the estrogen response early (upper) and late (lower) gene sets in MCF7 cells treated for 6 days with the indicated DOT1L inhibitor.


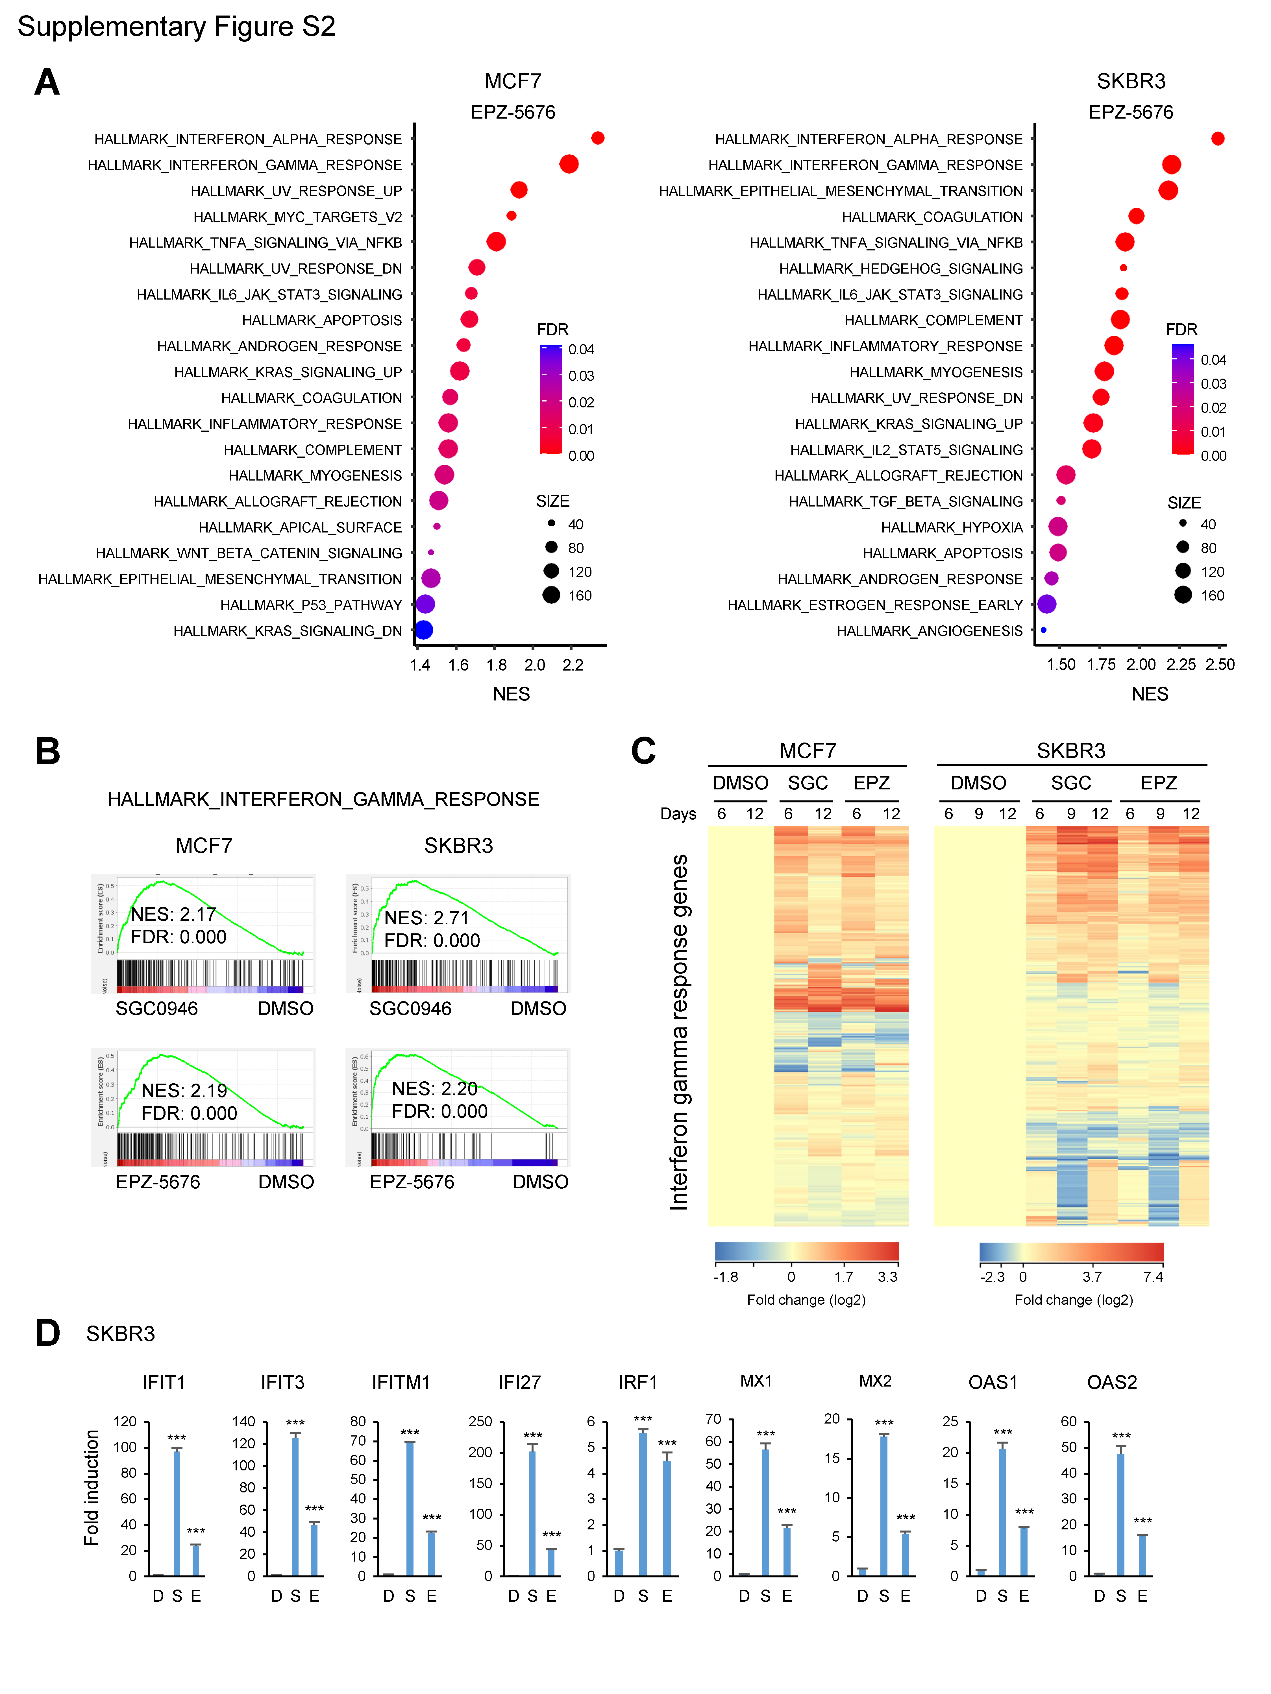


**Supplementary Figure S2**

DOT1L inhibition activates interferon (IFN) signaling in breast cancer cells. (A) Gene expression microarray results from MCF7 (left) and SKBR3 (right) cells treated for 6 days with DMSO or EPZ‑5676. Summarized results of a GSEA of the indicated hallmark gene sets using genes upregulated by EPZ‑5676 are shown. NES, normalized enrichment score; FDR, false discovery rate. (B) Results of a GSEA of the hallmark IFN-γ response gene set in breast cancer cells treated for 6 days with the indicated DOT1L inhibitor. (C) Heatmaps showing the microarray data for the hallmark IFN-γ response genes in breast cancer cells treated with DMSO, SGC0946 (SGC) or EPZ-5676 (EPZ) for the indicated periods. (D) qRT-PCR analysis of indicated IFN-related genes (IRGs) in SKBR3 cells treated with DMSO (D), SGC0946 (S) or EPZ-5676 (E) for 9 days. (n = 3). Error bars represent SDs. ****P*<0.001.


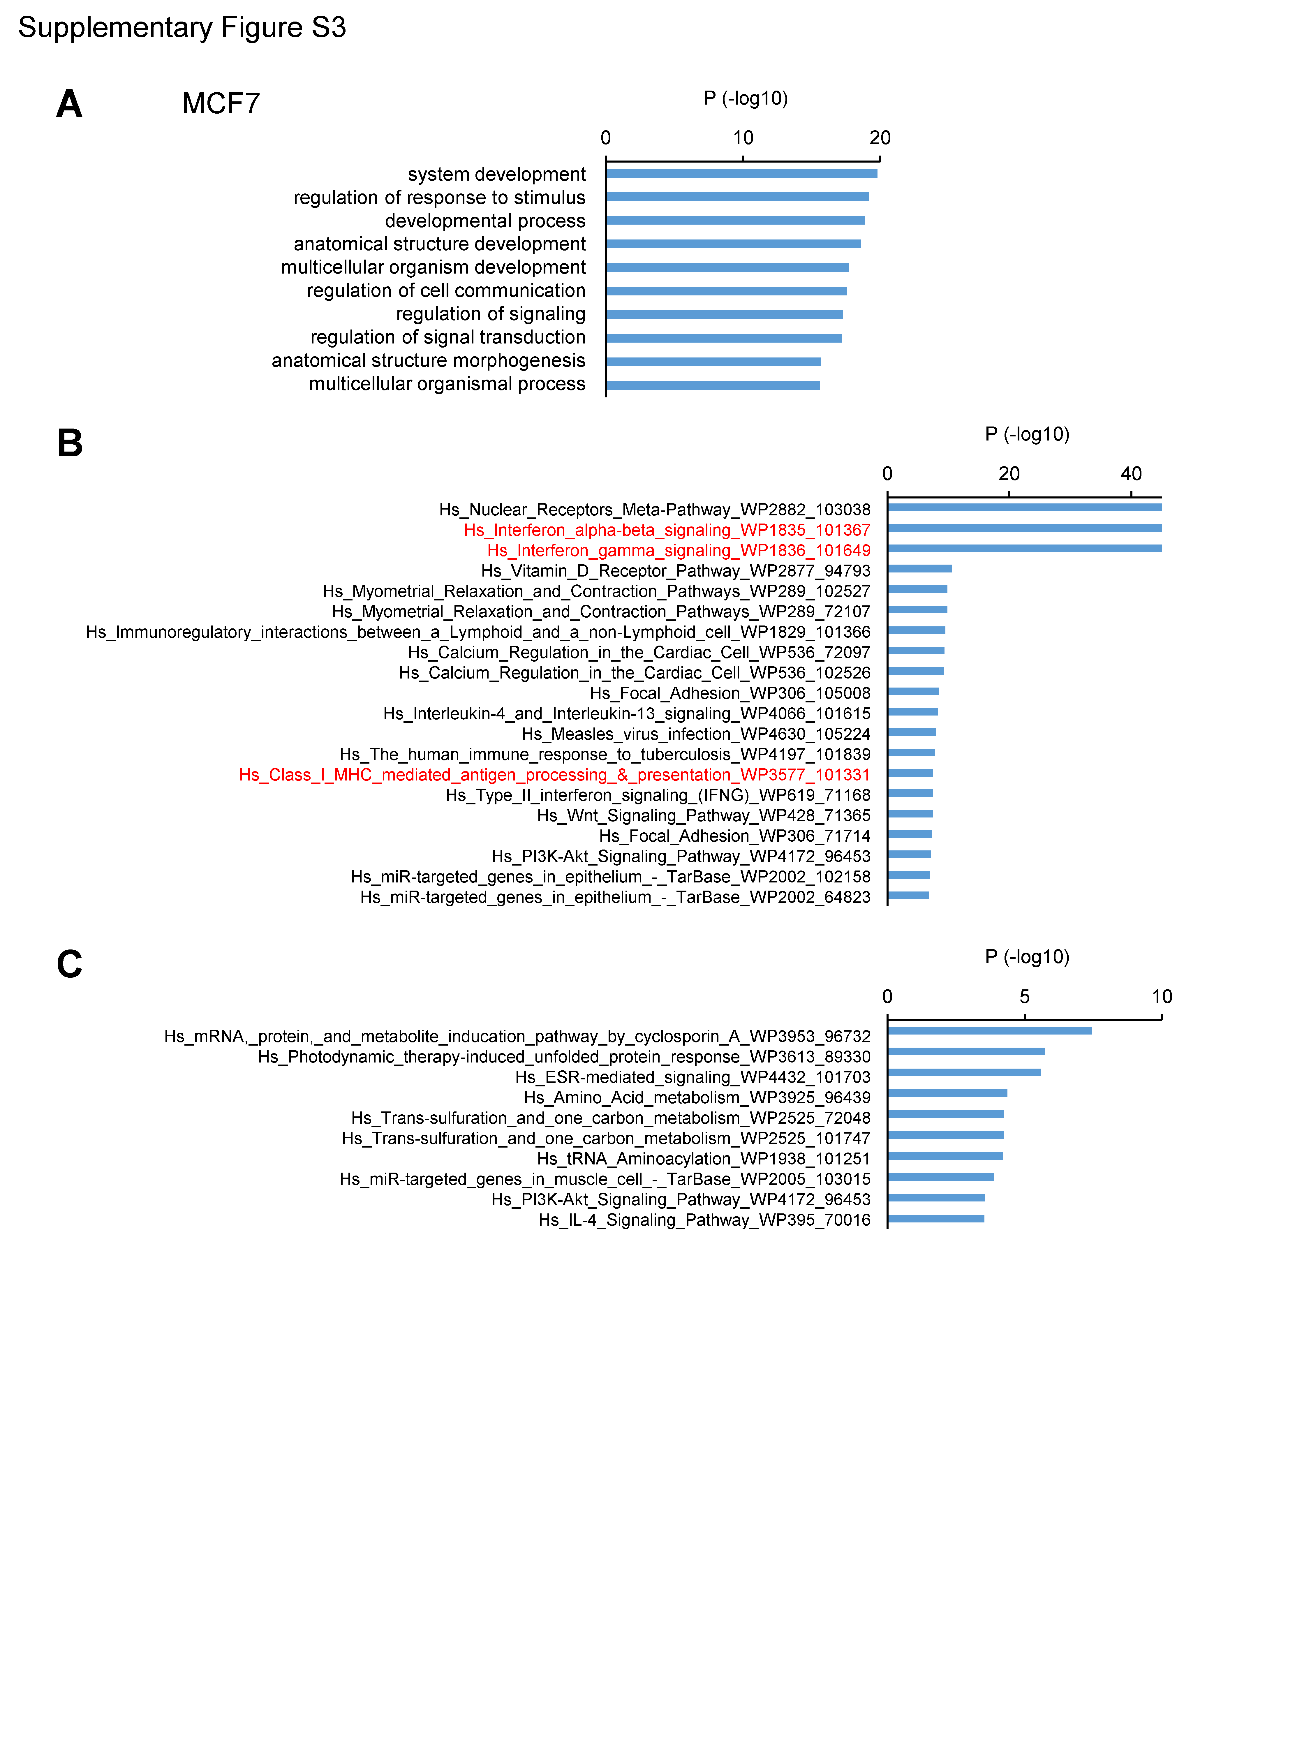


**Supplementary Figure S3**

Analysis of microarray data from MCF7 cells treated with DOT1L inhibitors. (A) Results of a Gene Ontology (GO) analysis using genes upregulated by DOT1L inhibition. MCF7 cells were treated for 6 days with DMSO, SGC0946 or EPZ-5676, after which gene expression microarray was performed. A series of 2310 probe sets (1924 unique genes) upregulated by the DOT1L inhibitors (>1.5-fold) were selected, after which GO analysis was performed. (B) Results of a pathway analysis using genes upregulated by DOT1L inhibition. (C) Results of a pathway analysis using genes downregulated by DOT1L inhibition. A series of 1869 probe sets (1464 unique genes) downregulated by the DOT1L inhibitors (>1.5-fold) were selected, after which pathway analysis was performed.


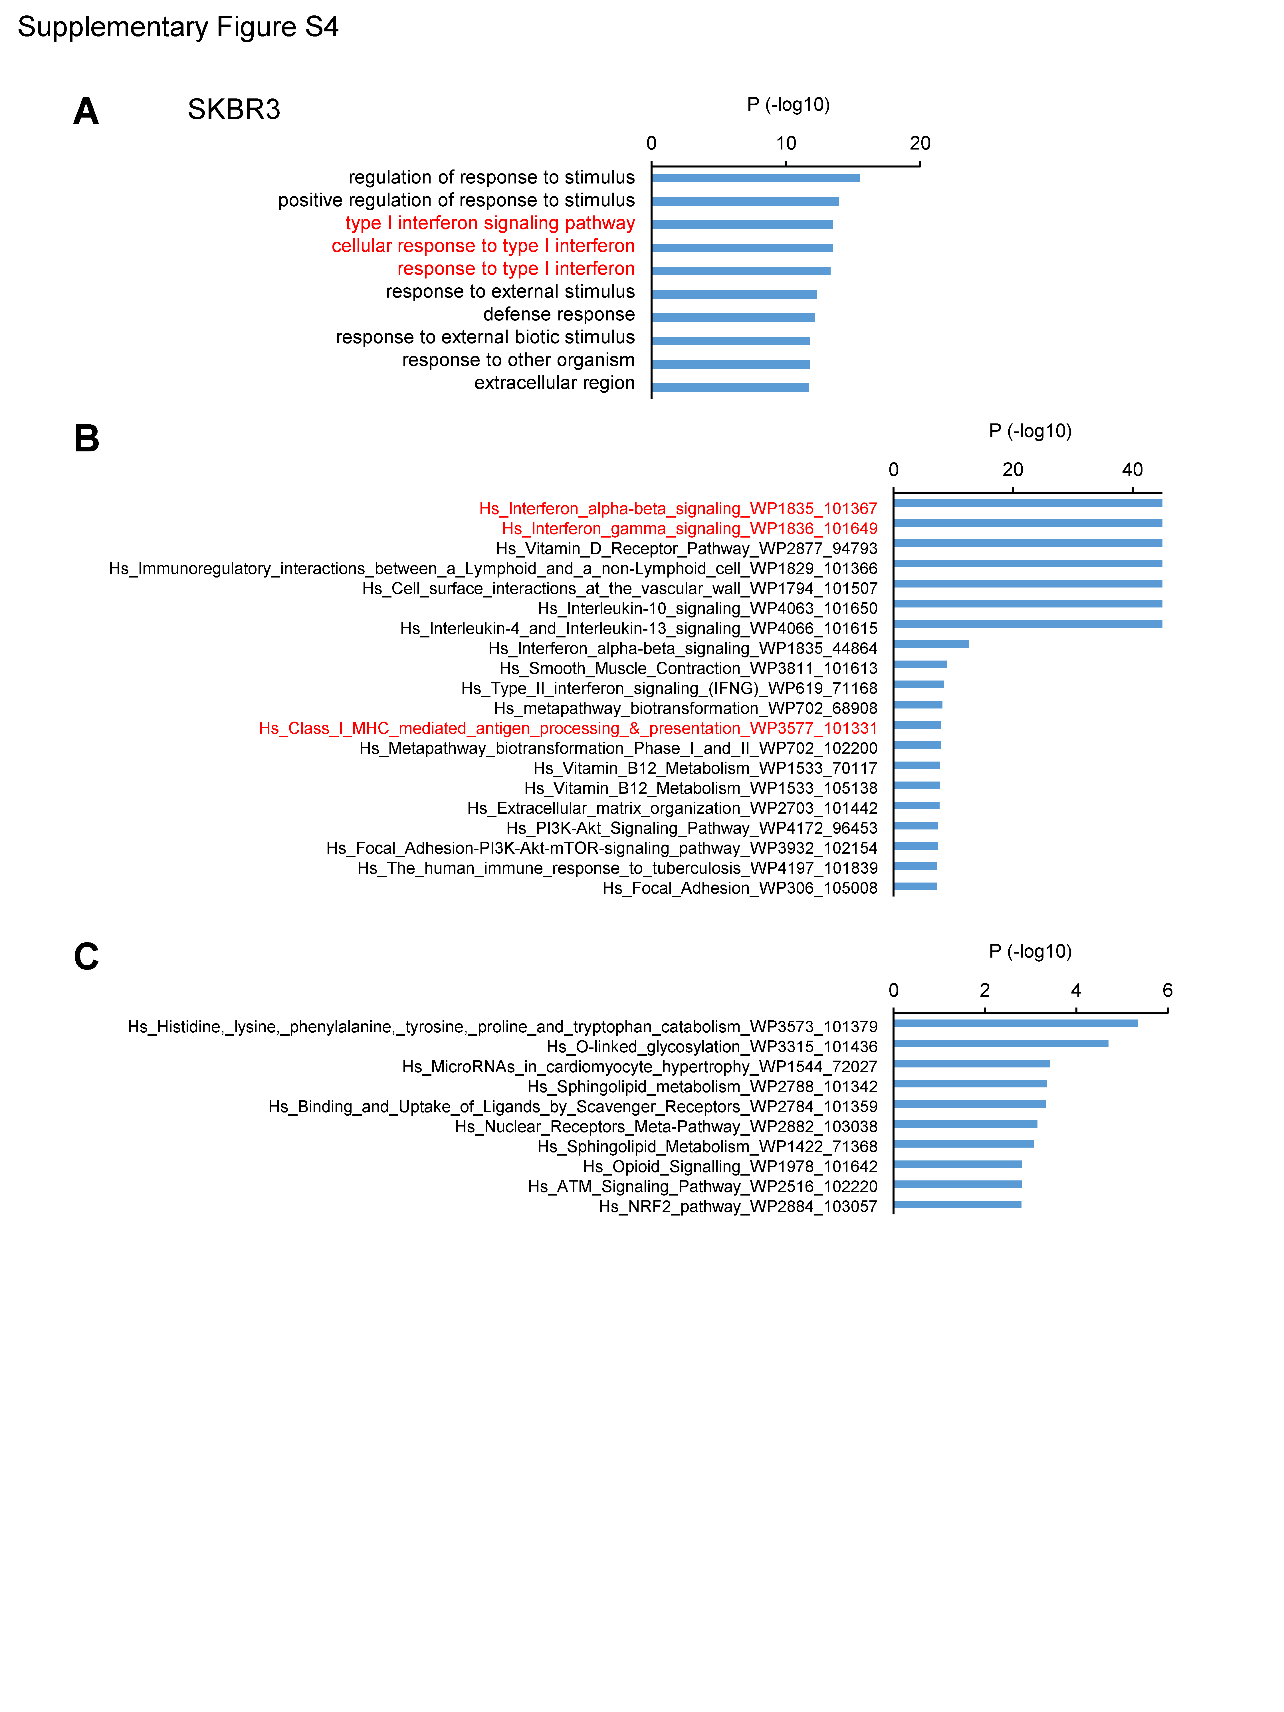


**Supplementary Figure S4**

Analysis of microarray data from SKBR3 cells treated with a DOT1L inhibitor. (A) Results of a Gene Ontology (GO) analysis using genes upregulated by DOT1L inhibition. SKBR3 cells were treated for 6 days with DMSO, SGC0946 or EPZ-5676, after which gene expression microarray was performed. A series of 1888 probe sets (1561 unique genes) upregulated by the DOT1L inhibitors (>1.5-fold) were selected, after which GO analysis was performed. (B) Results of a pathway analysis using genes upregulated by DOT1L inhibition. (C) Results of a pathway analysis using genes downregulated by DOT1L inhibition. A series of 1163 probe sets (930 unique genes) downregulated by the DOT1L inhibitors (>1.5-fold) were selected, after which pathway analysis was performed.


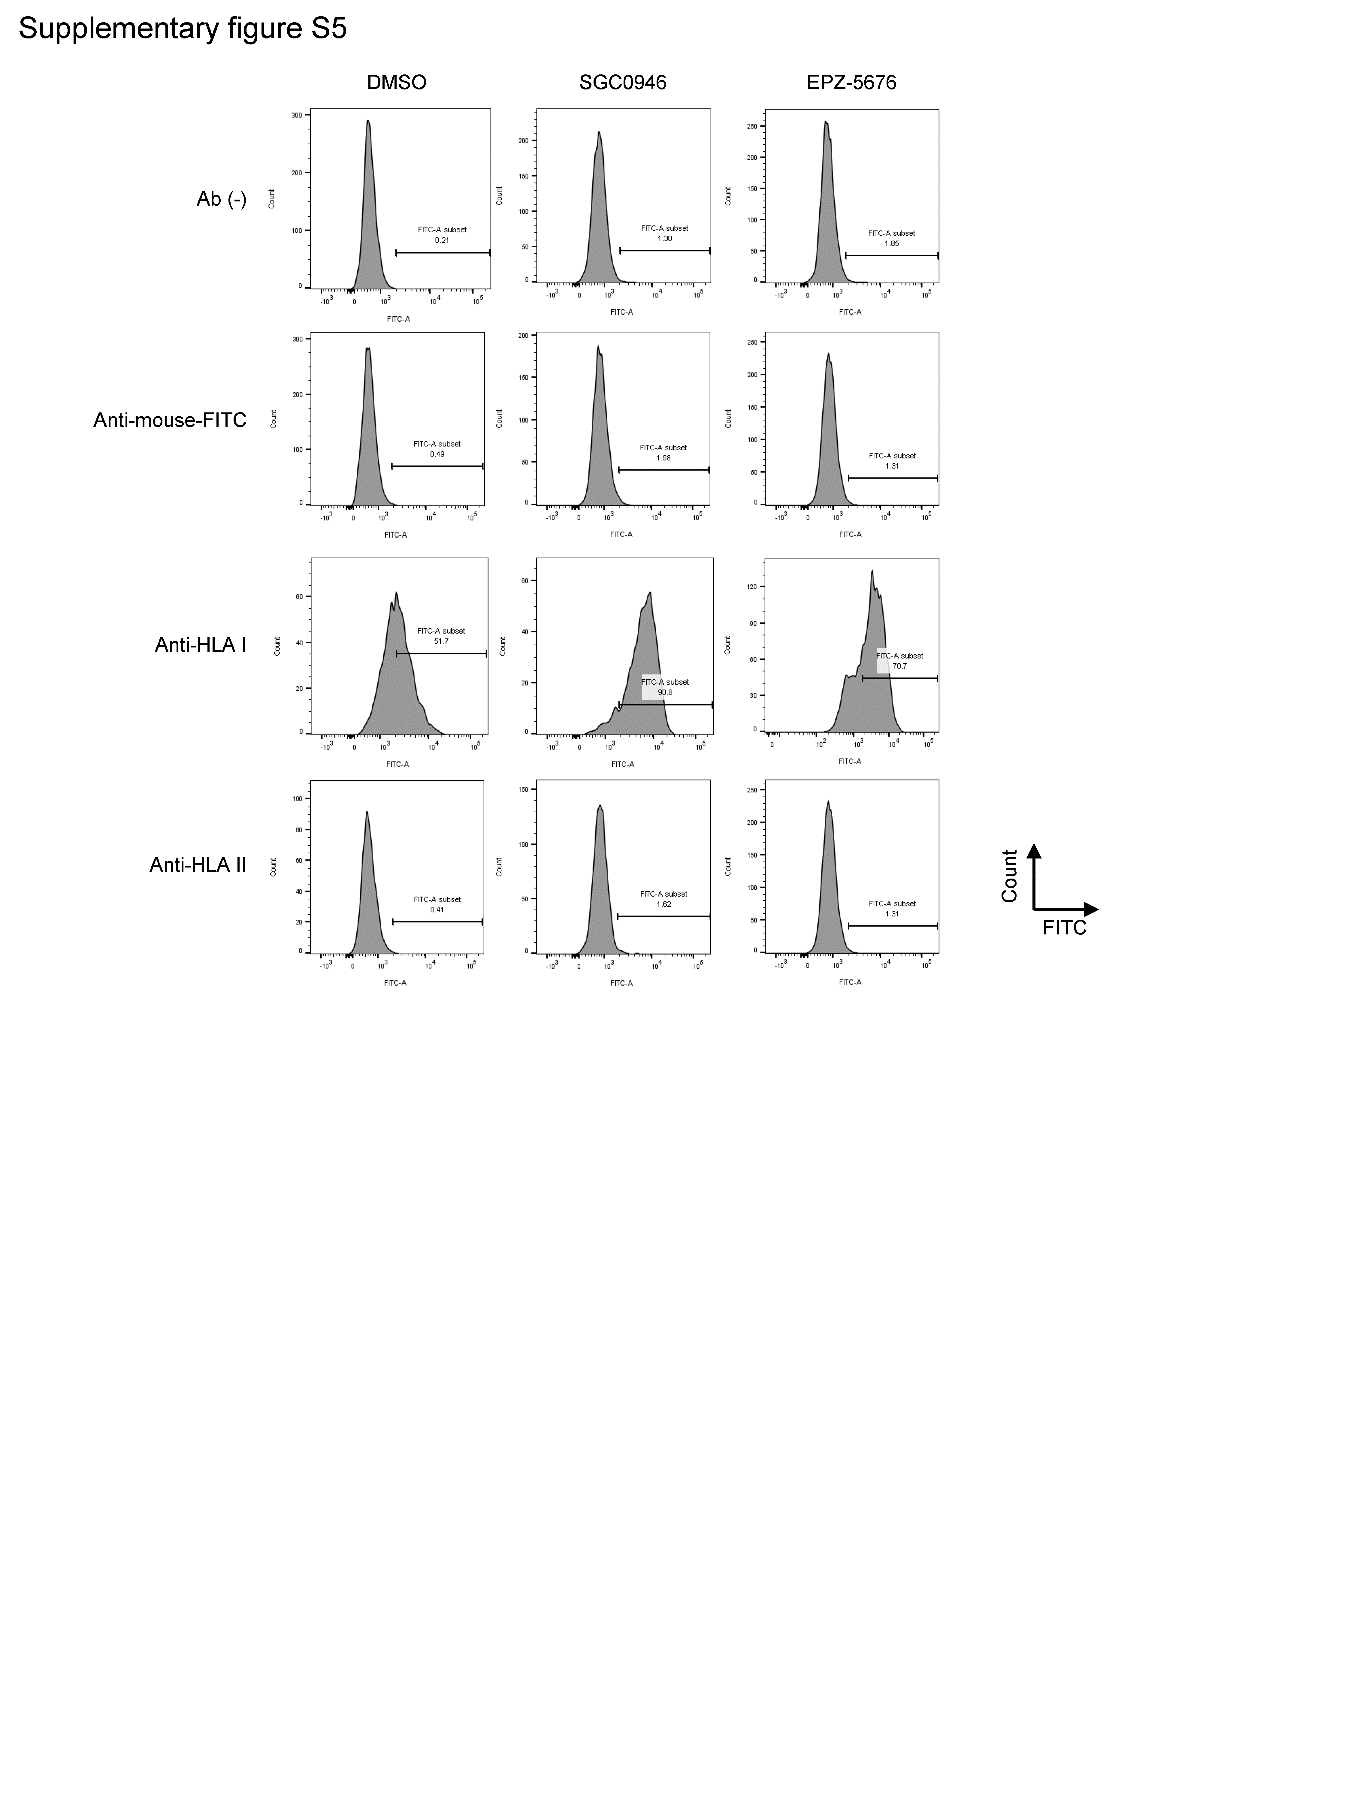


**Supplementary Figure S5**

DOT1L inhibition upregulates HLA expression in breast cancer cells. Shown are flow cytometry analyses of the cell surface expression of HLA class I and II molecules in MCF7 cell lines treated for 9 days with the indicated agents.


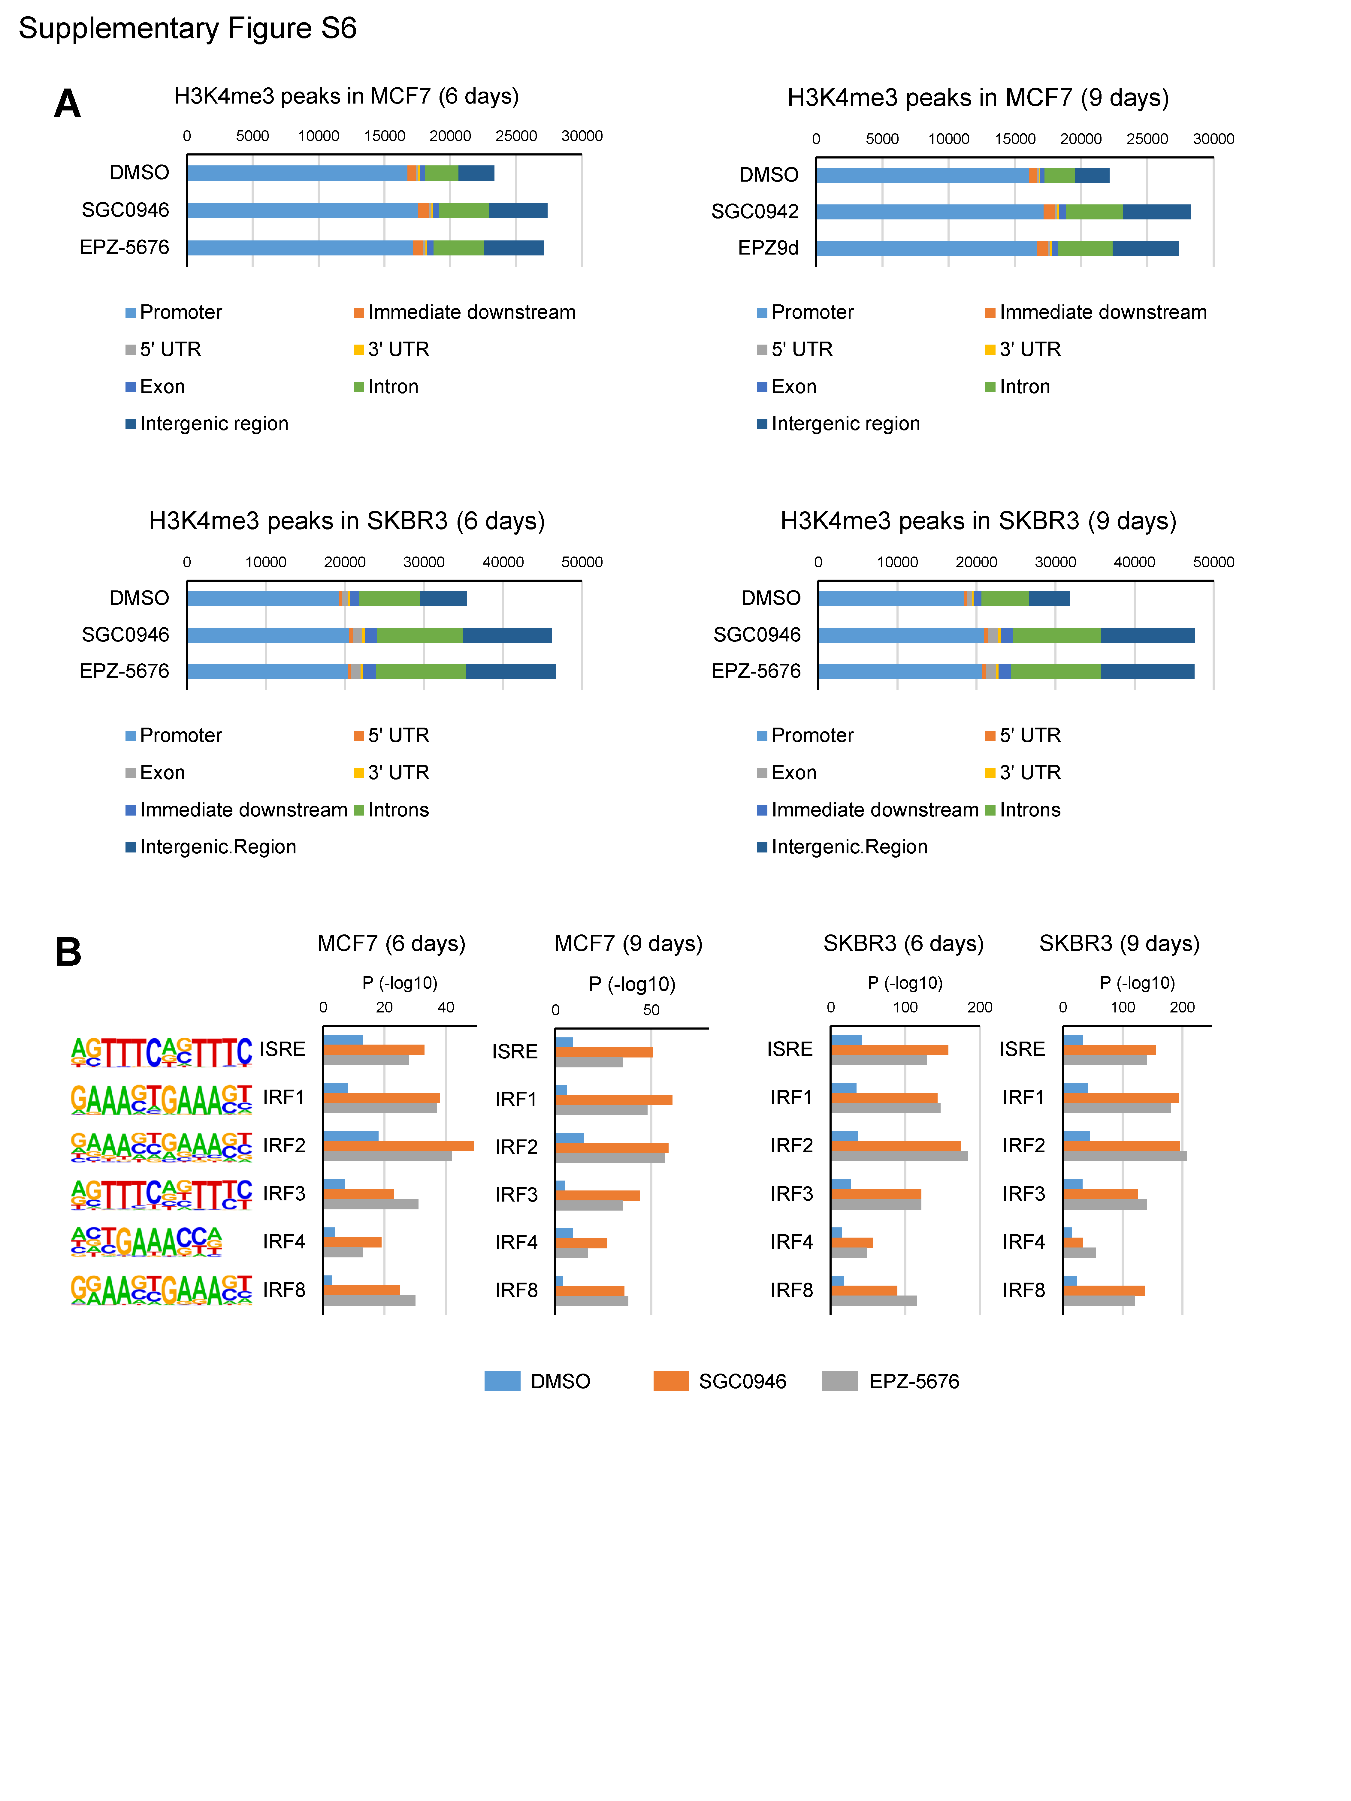


**Supplementary Figure S6**

ChIP-seq analysis of histone H3 lysine 4 trimethylation (H3K4me3) in breast cancer cells treated with a DOT1L inhibitor. (A) Numbers of H3K4me3 peaks and their genomic locations in MCF7 and SKBR3 cells treated for indicated periods with DMSO, SGC0946 or EPZ-5676. (B) Motif analysis of the H3K4me3 peaks in MCF7 and SKBR3 cells treated as indicated.


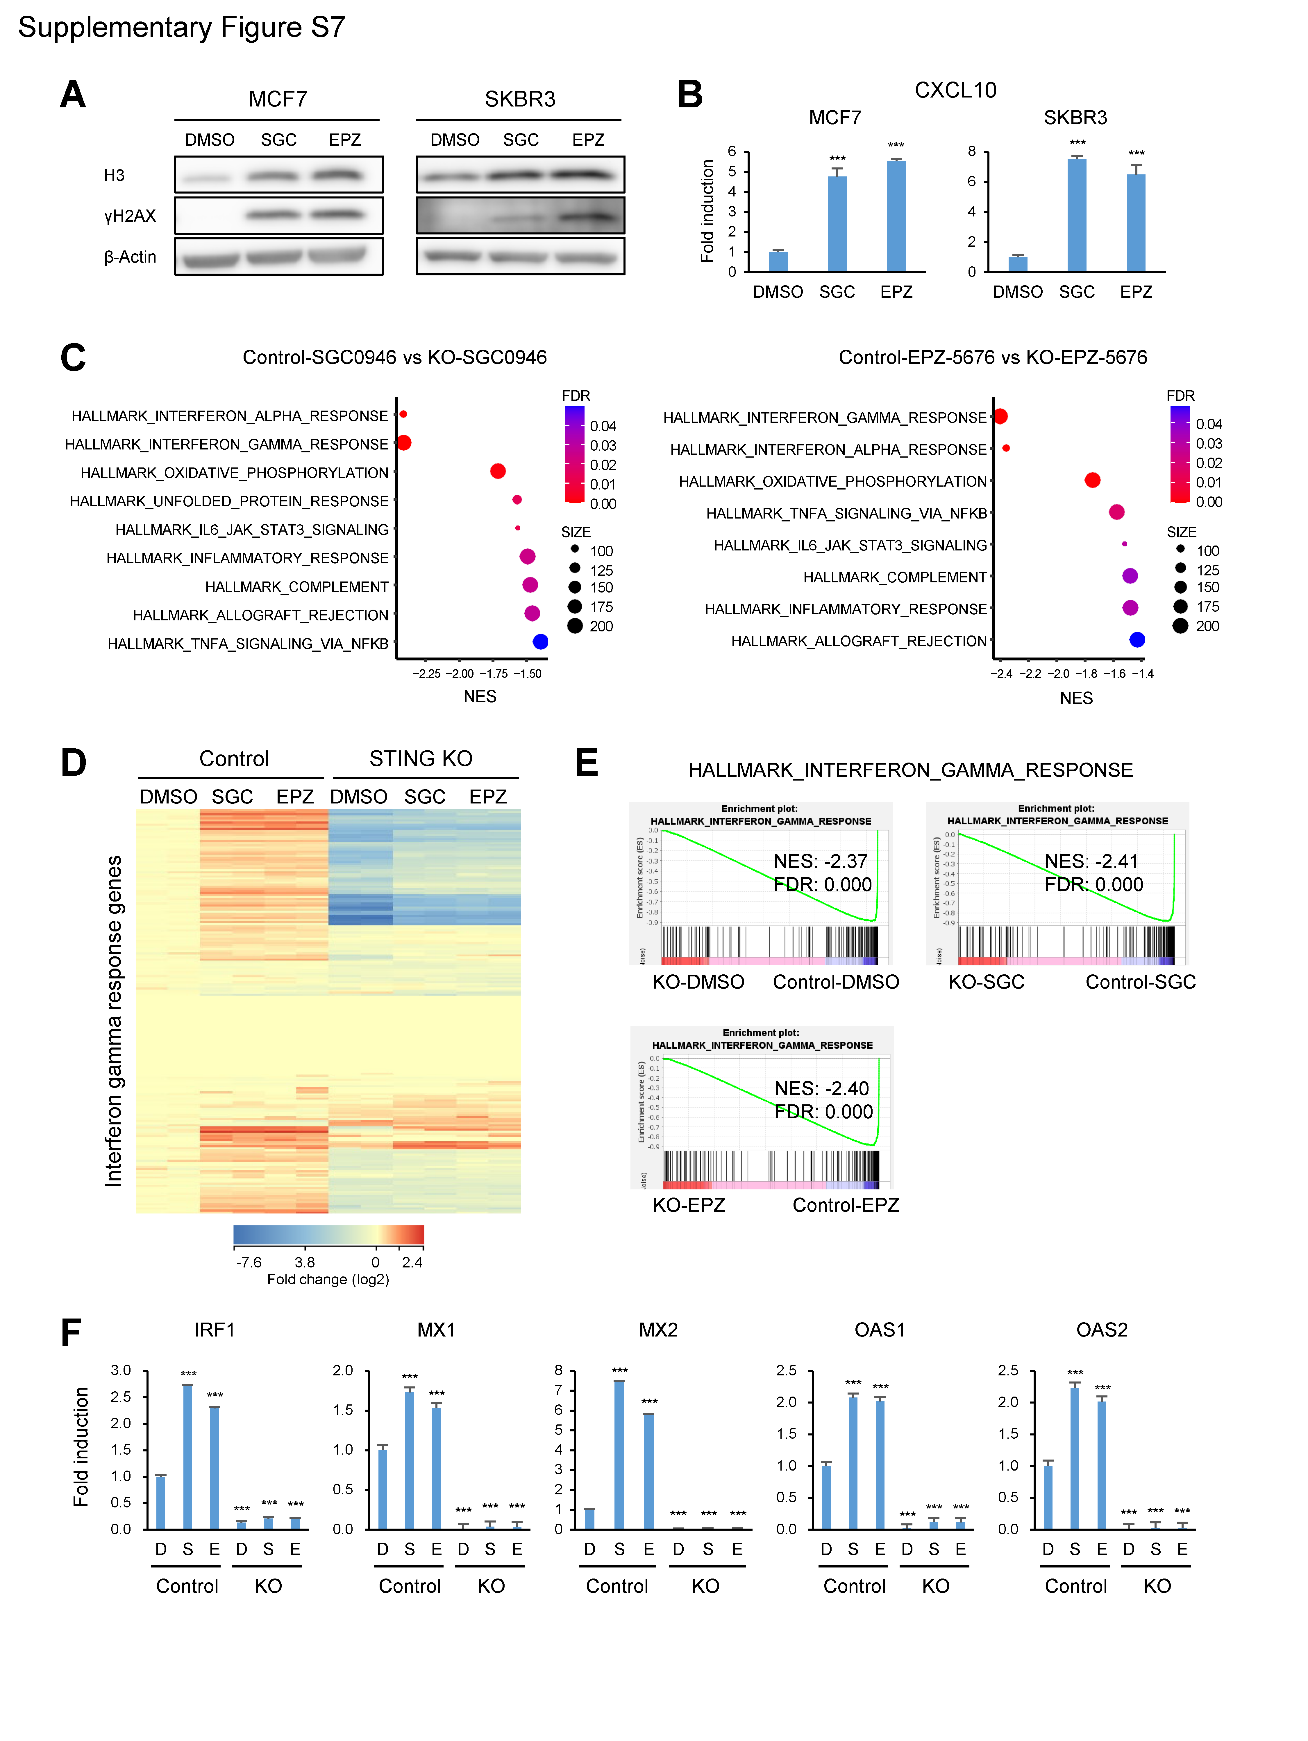


**Supplementary Figure S7**

The STING pathway is involved in the DOT1L inhibition-induced IFN signaling in breast cancer cells. (A) Western blot analysis of histone H3 and γ-H2AX in the cytoplasm of MCF7 and SKBR3 cells treated for 9 days with DMSO, SGC0946 (SGC) or EZP-5676 (EPZ). (B) qRT-PCR of CXCL10 in breast cancer cells treated for 9 days with the indicated agents. (C) Results of RNA-seq analysis in control and STING knockout (KO) MCF7 cells treated for 6 days with SGC0946 (left) or EPZ-5676 (right). Summarized results of GSEA of indicated gene sets using genes downregulated in KO cells are shown. (D) Heatmap showing the expression levels of the hallmark IFN-γ response genes in control and STING KO MCF7 cells treated for 6 days with the indicated agents. (E) GSEA of the hallmark IFN-γ response gene set in control and STING KO MCF7 cells treated for 6 days with indicated agents. (F) qRT-PCR analysis of the indicated IRGs in control and STING KO MCF7 cells treated for 6 days with DMSO (D), SGC0946 (S) or EPZ-5676 (E). Error bars represent SDs. ****P*<0.001.


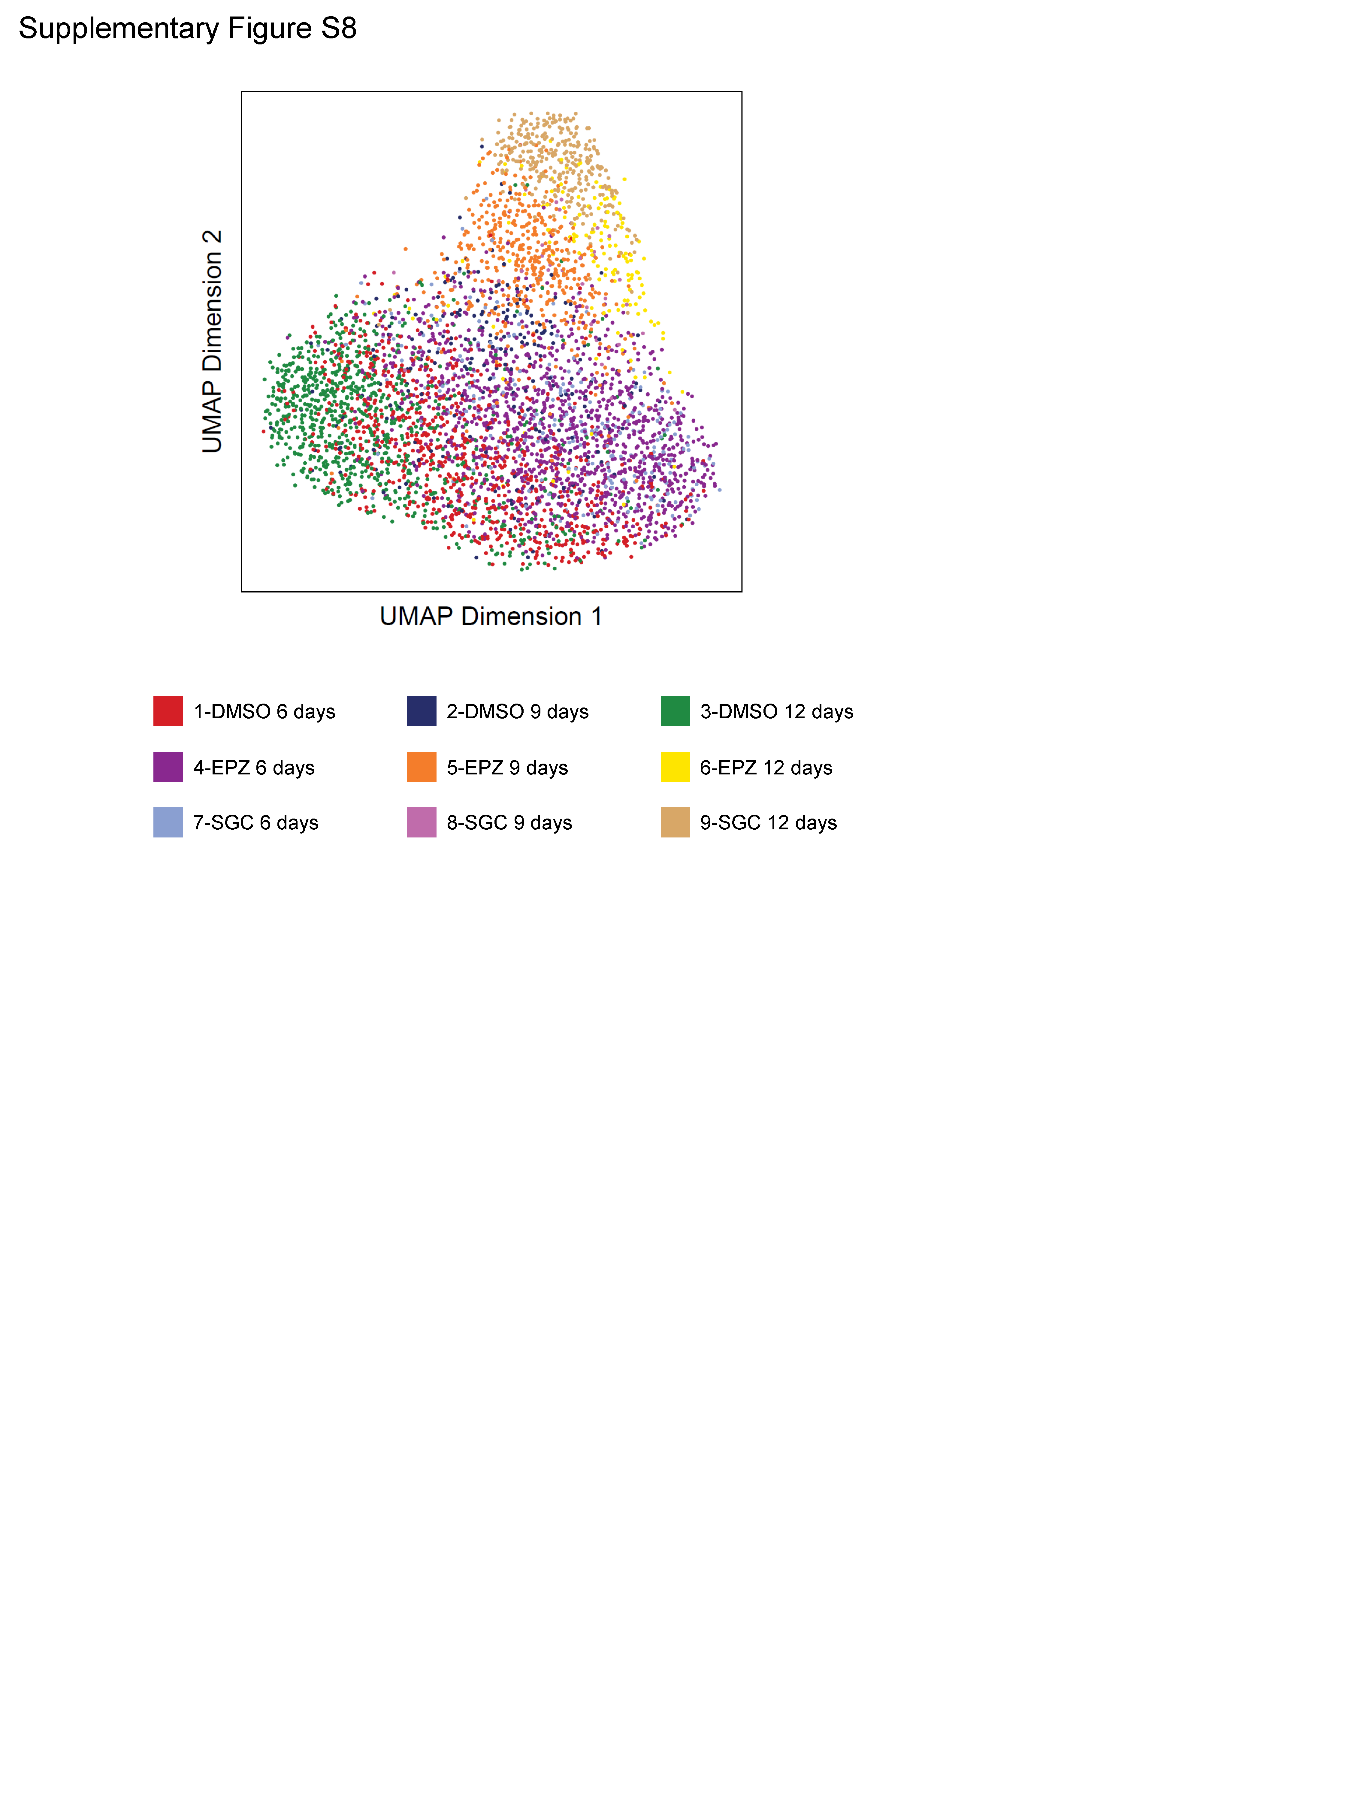


**Supplementary Figure S8**

Single-cell ATAC-seq (scATAC-seq) analysis in SKBR3 cells treated with a DOT1L inhibitor. Uniform manifold approximation and projection (UMAP) of the scATAC-seq data from SKBR3 cells treated for indicated periods with DMSO, SGC0946 (SGC) or EPZ-5676 (EPZ).
